# Supplementary material
Source: Springer Nature journal article supplement (https://www.springermedizin.de/resource/supplementary/12889_2008_1265_MOESM1_ESM.pdf/9502816)
Supplement: MOESM1 [file 9502816]

|                                          | Total, N=226 |           | Ethnical group, N= 223, 3 didn't answer |                  |               |           |             |
|------------------------------------------|--------------|-----------|-----------------------------------------|------------------|---------------|-----------|-------------|
|                                          |              |           | Kazakh, N=170                           |                  | Russian, N=41 |           | Other, N=12 |
| <b>Women's education (N=226)</b>         | %            | CI 95%    | %                                       | CI 95%           | %             | CI 95%    | %           |
| Never been to school                     | 0.9          | 0.2-3.2   | 1.2                                     | 0.3-4.2          | 0             | -         | 0           |
| Not finished nine-year compulsory school | 4.0          | 1.5-6.6   | 3.0                                     | 1.3-6.7          | 7.3           | 2.5-19.4  | 8           |
| Nine-year compulsory school              | 19.3         | 14.1-24.5 | 21.3                                    | 15.1-27.5        | 7.3           | 2.5-19.4  | 17          |
| Special college                          | 40.8         | 34.4-47.3 | <b>34.9</b>                             | <b>27.7-42.1</b> | <b>66.0</b>   | 51.3-80.4 | 42          |
| University/Institute/Academy             | 35.0         | 28.7-41.2 | 39.6                                    | 32.3-47.0        | 20            | 7.4-31.6  | 25          |
| Other                                    | 0            |           | 0                                       |                  | 0             |           | 8           |

Additional file 1.

Education among the pregnant women in Semey related to ethnic group.
